# Supplementary material
Source: publisher site journal article supplement (https://www.dovepress.com/get_supplementary_file.php?f=469687.docx)
Supplement: Supplementary file 1 [file get_supplementary_file.php]

## Supplementary Information

**Survival, proliferation and transcriptomic analysis of vascular endothelial cell culture in hydroxyapatite nanoparticles with different geometry**

*Weitang Sun1, Jingbin Zhong1, Buyun Gao2, Jieling Feng1, Zijie Ye1, Yueling Lin3, Kelan Zhang3, Wenqi Su3, Shibo Zhu1, Yinghua Li4, and* *Wei Jia*1*

*, Corresponding author

1 Department of Pediatric Urology, Guangzhou Women and Children's Medical Center, Guangzhou Medical University, China;

2 School of Pharmacy, Fudan University, China;

3 Institute of Pediatrics, Guangzhou Women and Children's Medical Center, Guangzhou Medical University, China;

4 Center Laboratory, Guangzhou Women and Children's Medical Center, Guangzhou Medical University, Guangzhou, China;

**
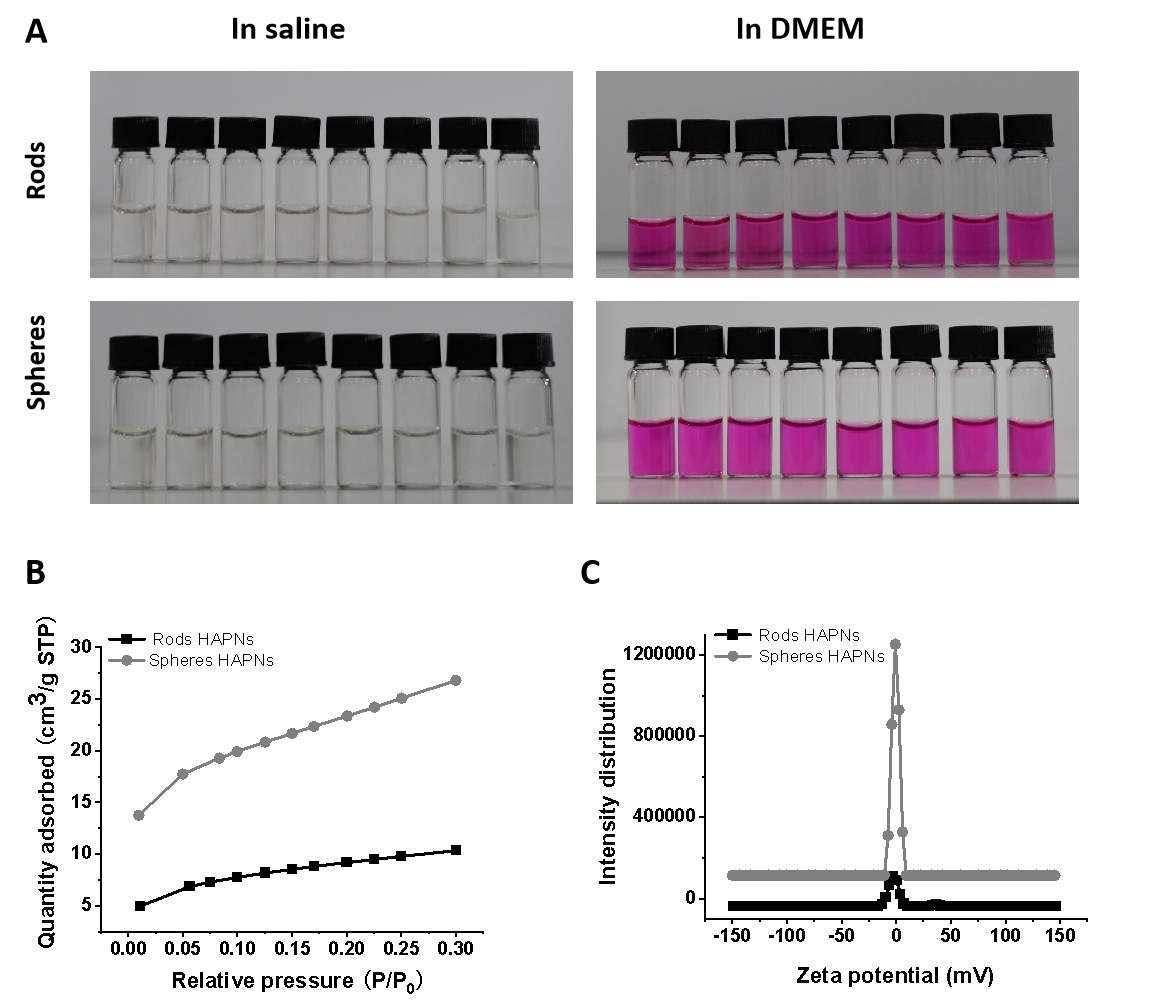
**

**Fig. S1. Physical characteristics of rods and spheres HAPNs.** A, Digital photographs of rods and spheres HAPNs dispersed in saline (left panel) and DMEM (right panel). The concentrations range from left to right are: 2 μM, 20 μM, 100 μM, 200 μM, 500 μM, 1000 μM, and 2000 μM, respectively. B, Representative BET isotherm linear plot of rods and spheres HAPNs. Experiments were treated three times. C, Representative zeta potential of rods and spheres HAPNs. Experiments were repeated three times.


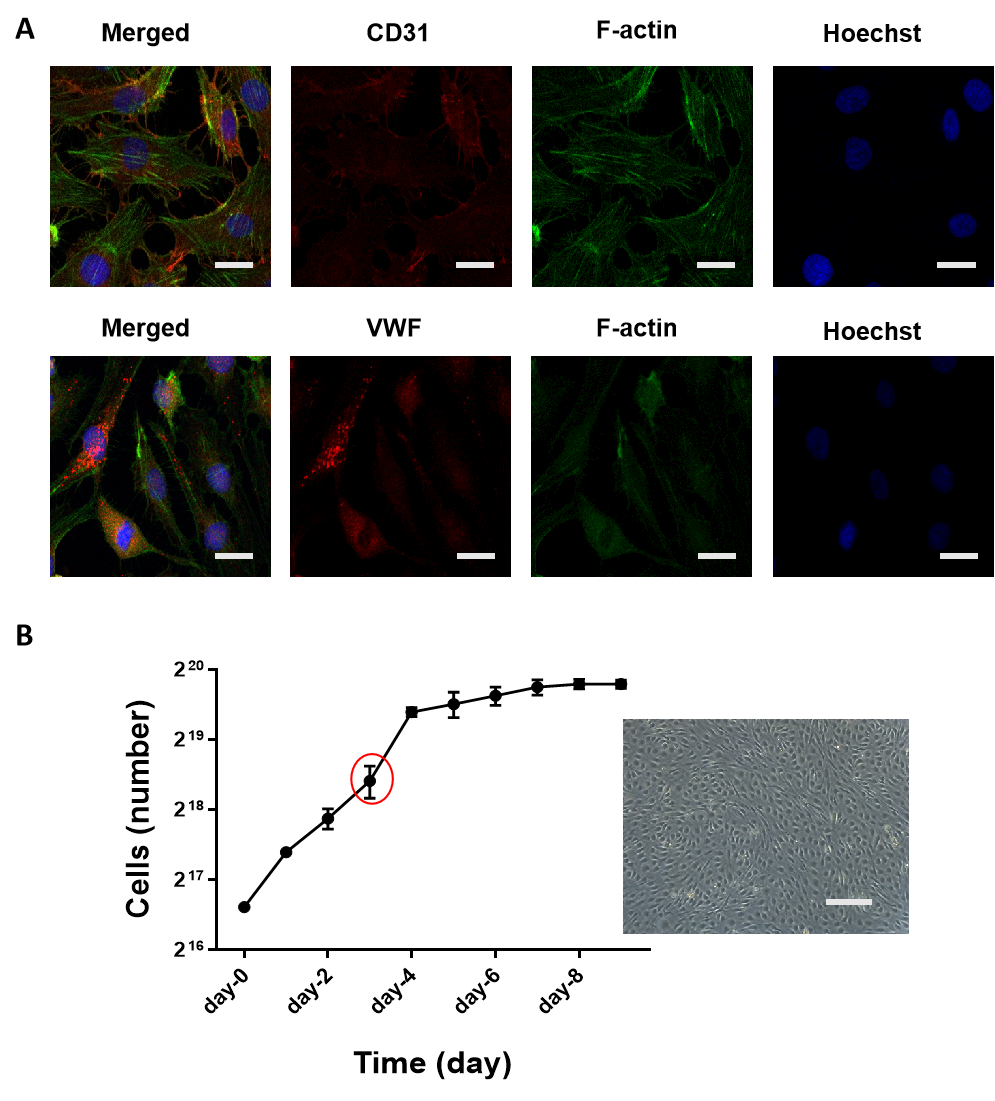


**Fig. S2. *In vitro* isolation, culture and identification of HUVECs.** A, Representative immunofluorescence staining of primary HUVECs staining of CD31 (upper panel) and VWF (lower panel). Images are fluorescence micrographs of the nucleus (Hoechst, blue), F-actin network (FITC-phalloidin, green) and VECs-specific markers CD31, VWF (Cy3, red). Growth curves of cultured HUVECs at 0, 2, 4, 6 and 8 days. The inset in B showed the bright field of HUVEC monolayer. Scale bar: A, 20 μm; B, 200 μm.


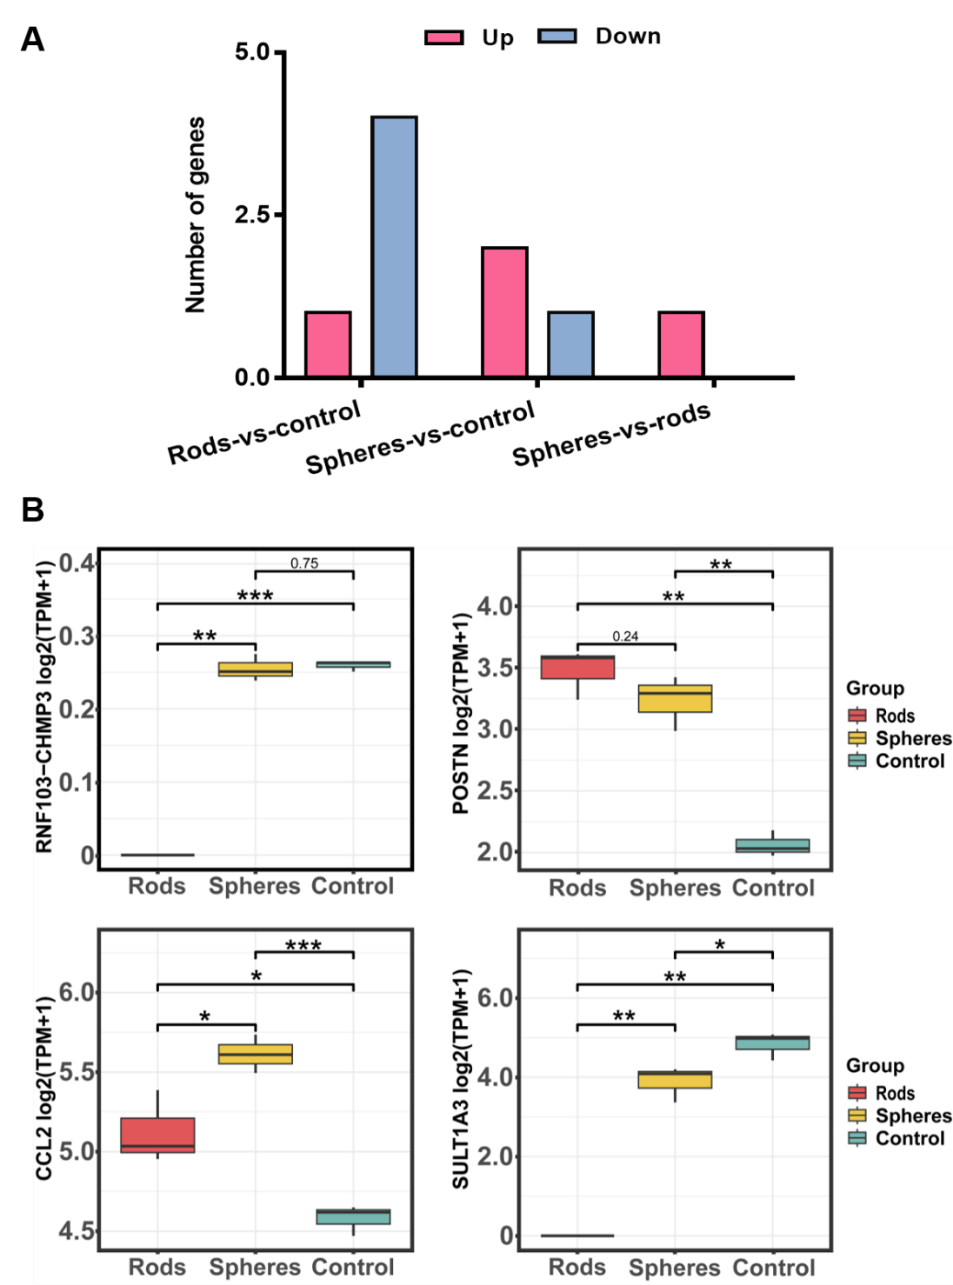


**Fig. S3. Gene expression patterns of the tested samples.** A, DEG numbers of rods or spheres HAPN-treated HUVEC monolayer compared with controlled HUVEC monolayer as well as spheres HAPN-treated HUVEC monolayer compared with rods HAPN-treated HUVEC monolayer. B, Box diagram of DEGs between rods or spheres HAPN-treated HUVEC monolayer compared with controlled HUVEC monolayer. Data are displayed as mean ± S.D. (n = 3). Statistical difference was analyzed via two-tailed Student’s *t*-test. **p* < 0.05, ***p* < 0.01, ****p* < 0.001.


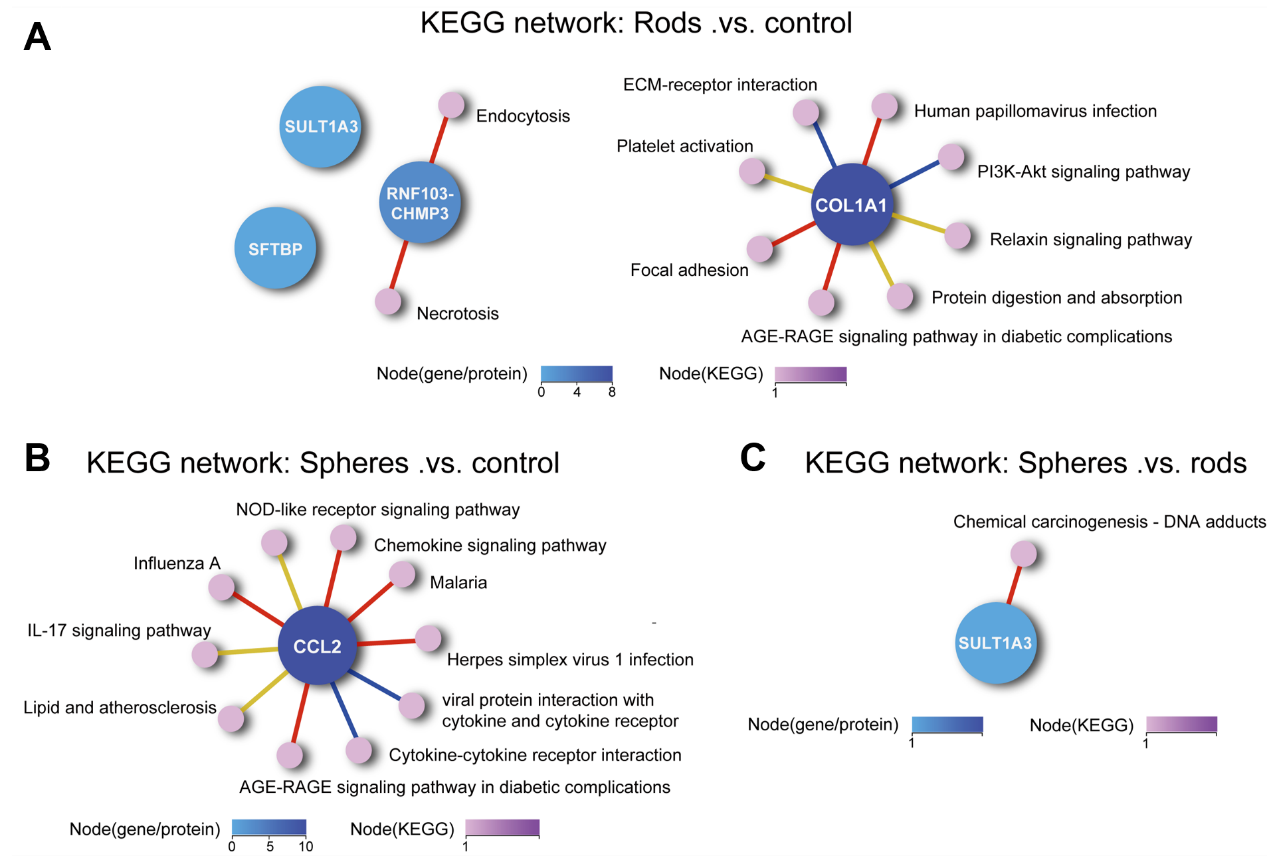


**Fig. S4. KEGG pathway network of DEGs after two groups comparison.**


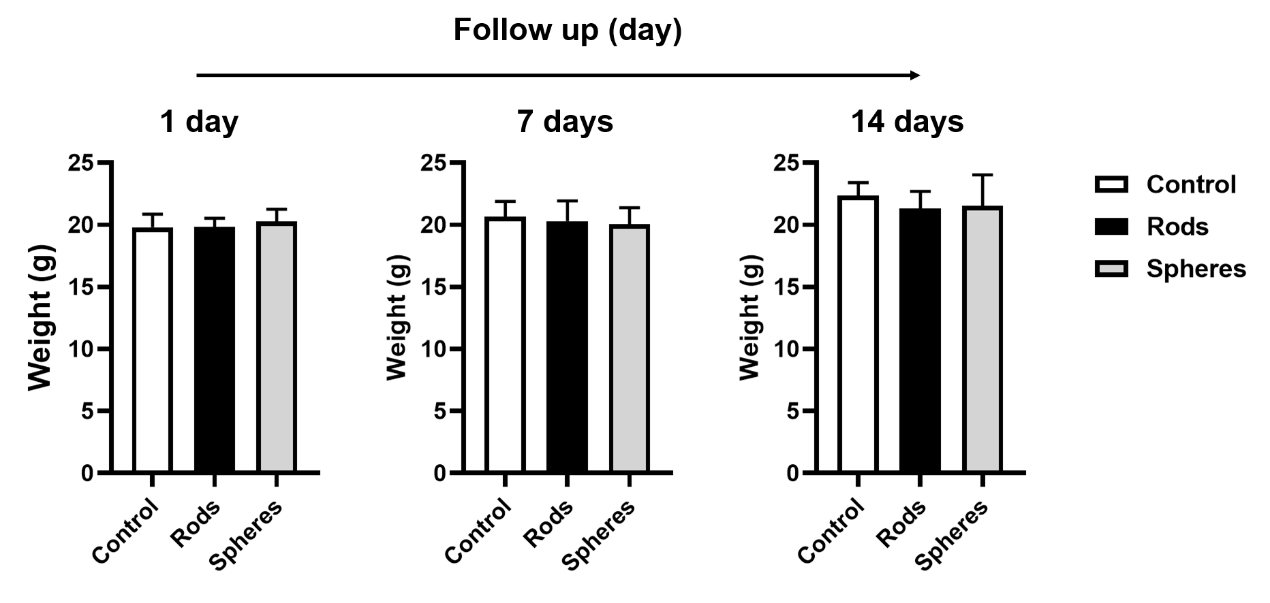


**Fig. S5.** **Weight changes of mice in different groups.** Data are presented as mean ± S.D. (n = 3). Statistical differences were calculated via one-way ANOVA with a Tukey post-hoc test.

**
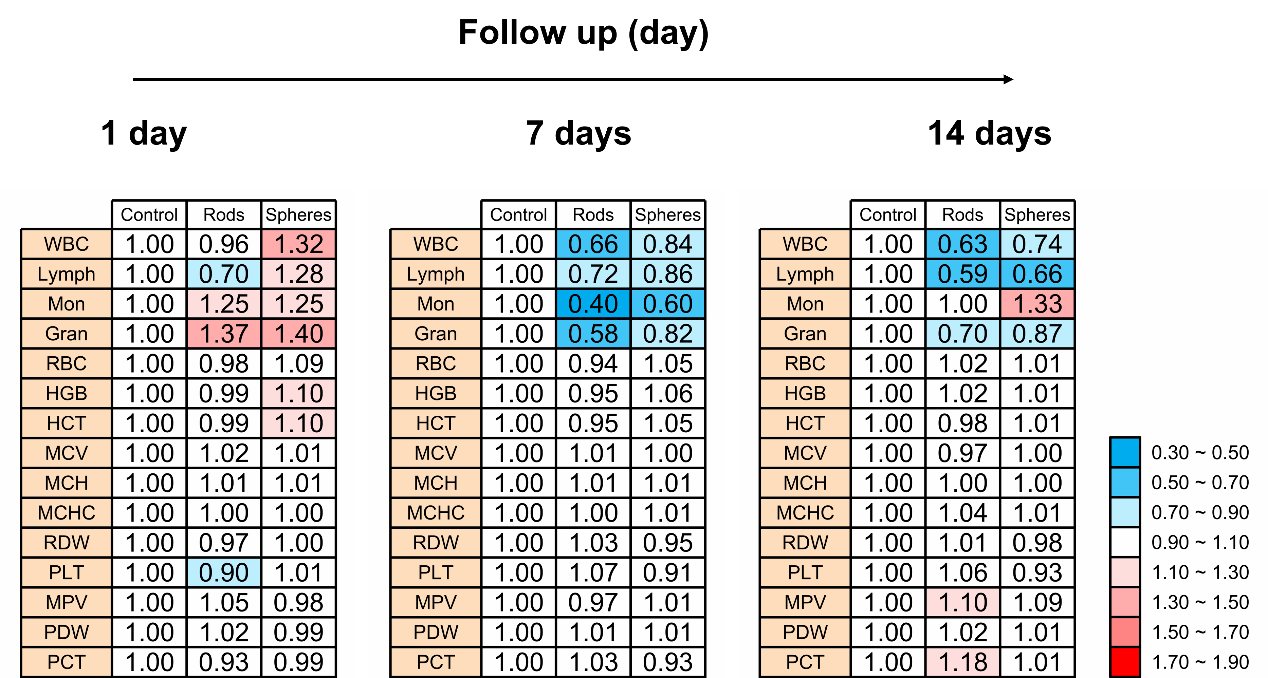
**

**Fig. S6. Heat map of representative haematological data of mice gavage with rods or spheres HAPNs at 1, 7, and 14 days.** Data are displayed as relative quantification (RQ) to saline-treated mice.


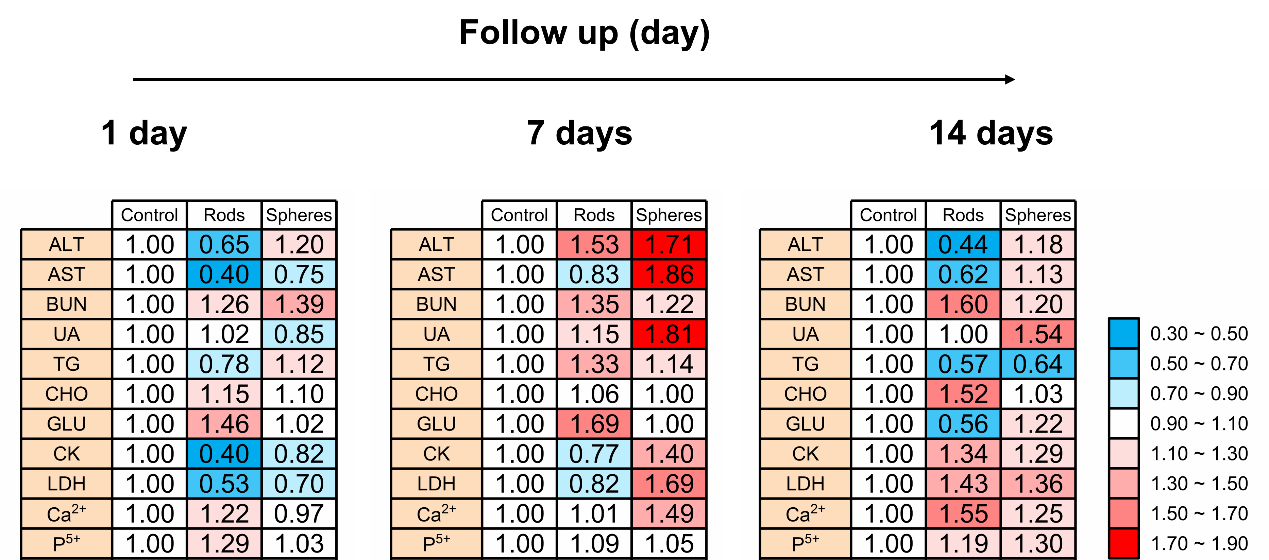


**Fig. S7.** **Heat map of representative serum biochemistry data of mice gavage with rods or spheres HAPNs at 1, 7, and 14 days.** Data are displayed as relative quantification (RQ) to saline-treated mice.


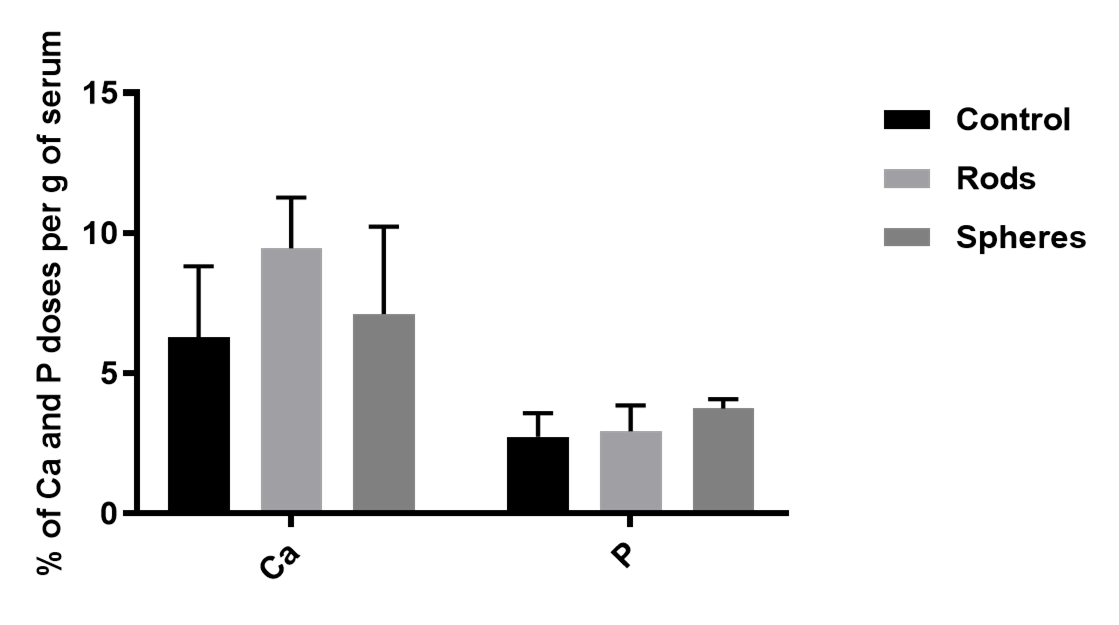


**Fig. S8. *In vivo* biodistribution of Ca and P in-blood serum of mice in different groups at 14 days post-gavage.** Data are presented as mean ± S.D. (n = 3). Statistical differences were analyzed by one-way ANOVA with a Tukey post-hoc test.

**Table S1. Comparison of ECG parameters changes of mice in different groups at 1, 7 and 14 days post-gavage.** The ECG parameters value are presented as mean ± S.D. (n = 3).

| **Time** | **Group** | **Parameter** | | | | | | | | | | | |
| --- | --- | --- | --- | --- | --- | --- | --- | --- | --- | --- | --- | --- | --- |
| **HR**  **(bpm)** | **PR**  **Interval**  **(ms)** | **QT**  **Interval**  **(ms)** | **QTC**  **Interval**  **(ms)** | **QRS**  **Duration**  **(ms)** | **ST**  **Segment**  **(ms)** | **P**  **Amplitude**  **(mV)** | **R**  **Amplitude**  **(mV)** | **T**  **Amplitude**  **(mV)** | **S**  **Amplitude**  **(mV)** | **Q**  **Amplitude**  **(mV)** | **ST**  **Height**  **(mV)** |
| Day-1 | Control | 388.67±15.5 | 27.67±12.86 | 36.33±3.53 | 91.33±7.54 | 11±0 | 2±0 | 0.05±0.03 | 0.67±0.12 | 0.17±0.05 | -0.3±0.06 | -0.07±0.01 | -0.04±0.06 |
| Rods | 383±70.29 | 76±28.62 | 30.33±7.26 | 76.67±23.14 | 11±0 | 2±0 | 0.05±0.04 | 0.53±0.18 | 0.1±0.11 | -0.23±0.04 | -0.1±0.08 | -0.07±0.06 |
| Spheres | 441.33±25.85 | 30±2.89 | 61.67±29.18 | 162.33±72.42 | 11±0 | 30.67±28.67 | 0.05±0.01 | 0.73±0.08 | 0.1±0.02 | -0.2±0.03 | -0.06±0.01 | -0.03±0.03 |
| Day-7 | Control | 381.67±10.37 | 32.67±6.74 | 39.67±5.78 | 99±13.32 | 11±0 | 2±0 | 0.05±0.01 | 0.54±0.03 | 0.17±0.03 | -0.19±0.03 | -0.03±0.01 | 0±0.03 |
| Rods | 360.67±12.99 | 33.33±9.53 | 32.67±4.18 | 79.67±10.68 | 11.67±0.33 | 2±0 | 0.08±0.03 | 0.71±0.05 | 0.17±0.04 | -0.06±0.07 | -0.04±0.01 | 0.08±0.03 |
| Spheres | 383.67±14.75 | 65±33.72 | 29.67±8.41 | 73.33±20.27 | 11.33±0.33 | 2±0 | 0.09±0.04 | 0.67±0.09 | 0.14±0.08 | -0.11±0.03 | -0.05±0.01 | 0.06±0.02 |
| Day-14 | Control | 357.33±22.43 | 47.33±15.21 | 38.67±4.1 | 94.33±11.26 | 11.67±0.33 | 2±0 | 0.07±0.03 | 0.85±0.2 | 0.19±0.03 | -0.11±0.02 | -0.02±0.01 | 0±0.02 |
| Rods | 369.67±21.79 | 39.33±6.36 | 41±5.51 | 100.33±11.46 | 11.33±0.67 | 2±0 | 0.1±0.05 | 0.78±0.17 | 0.29±0.09 | -0.22±0.06 | -0.01±0.01 | 0±0.06 |
| Spheres | 334±13.43 | 64.67±48.09 | 27±6.43 | 62.67±14.33 | 11.33±0.33 | 2±0 | 0.08±0.05 | 0.74±0.28 | 0.09±0.22 | -0.23±0.14 | -0.21±0.15 | -0.05±0.17 |
